# Supplementary material for: Unprecedented binodal (7,9)-connected network based on distinct tricobalt(ii) clusters: structure, topology and cooperative magnetism
Source: Royal Society of Chemistry journal article supplement (doi:10.1039/c2ce06020e), 2012-01-01
Supplement: c2ce06020e.pdf [file c2ce06020e.pdf]

## Supporting Information

### Binodal (7,9)-connected network based on distinct tricobalt(II) clusters: structure, topology and cooperative magnetism

*Qing Chen,<sup>a</sup> Wei Xue,<sup>a</sup> Bao-Ying Wang,<sup>a</sup> Ming-Hua Zeng,<sup>\*b</sup> Xiao-Ming Chen<sup>\*a</sup>*

<sup>a</sup> MOE Key Laboratory of Bioinorganic and Synthetic Chemistry, State Key Laboratory of Optoelectronic Materials and Technologies, School of Chemistry and Chemical Engineering, Sun Yat-Sen University, Guangzhou 510275, P. R. China.

<sup>b</sup> Key Laboratory for the Chemistry and Molecular Engineering of Medicinal Resources (Ministry of Education of China), School of Chemistry and Chemical Engineering, Guangxi Normal University, Guilin 541004, P. R. China.

Corresponding authors: [zmh@mailbox.gxnu.edu.cn](mailto:zmh@mailbox.gxnu.edu.cn) (M.-H. Zeng) and [cxm@mail.sysu.edu.cn](mailto:cxm@mail.sysu.edu.cn) (X.-M. Chen).

**Table S1.** Selected bond lengths (Å) and angles (°).

| 1            |           |             |          |              |          |
|--------------|-----------|-------------|----------|--------------|----------|
| Co1-O1       | 2.0281(1) | Co1-O6      | 2.098(5) | Co2-O8       | 2.052(5) |
| Co1-O5a      | 2.118(5)  | Co1-N1      | 2.162(7) | Co2-O4b      | 2.093(5) |
| Co2-O2       | 2.120(5)  | Co2-N3c     | 2.161(6) | Co2-N2       | 2.162(6) |
| Co2-O3       | 2.196(5)  | Co3-O7      | 1.966(1) | Co3-O2       | 2.038(7) |
| Co3-O1W      | 2.145(2)  | Co3-O1S     | 2.16(2)  | Co3-O2W      | 2.260(1) |
| O1-Co1-O6    | 94.26(2)  | O1-Co1-O5a  | 90.19(2) | O6-Co1-O5a   | 87.3(3)  |
| O6d-Co1-O5a  | 175.4(2)  | O1-Co1-N1   | 176.6(2) | O6-Co1-N1    | 88.1(2)  |
| O5a-Co1-N1   | 87.3(2)   | O8-Co2-O4e  | 174.5(2) | O8-Co2-O2    | 94.0(2)  |
| O4e-Co2-O2   | 91.3(3)   | O8-Co2-N3c  | 91.9(2)  | O4e-Co2-N3c  | 86.1(2)  |
| O2-Co2-N3c   | 96.9(2)   | O8-Co2-N2   | 86.2(2)  | O4e-Co2-N2   | 88.7(2)  |
| O2-Co2-N2    | 173.4(2)  | O8-Co2-O3   | 89.8(2)  | O4e-Co2-O3   | 92.4(2)  |
| O2-Co2-O3    | 81.6(2)   | N3c-Co2-O3  | 177.8(2) | N2-Co2-O3    | 91.9(2)  |
| O7-Co3-O2    | 103.9(4)  | O7-Co3-O1W  | 159.5(6) | O2-Co3-O1W   | 96.2(5)  |
| O7-Co3-O1Sf  | 87.5(6)   | O2-Co3-O1Sf | 91.8(5)  | O1W-Co3-O1Sf | 95.8(9)  |
| O7-Co3-O1S   | 150.3(7)  | O7-Co3-O1S  | 87.5(6)  | O1S-Co3-O2W  | 82.0(5)  |
| O1S-Co3-O1Sf | 66.6(1)   | O7-Co3-O2W  | 78.2(4)  | O2-Co3-O2W   | 176.0(5) |

Symmetry codes: a)  $-x+y+1, -x+1, z$ ; b)  $-x+1, -y+1, -z+1$ ; c)  $x-y, x, -z+1$ ; d)  $x, y, -z+3/2$ ; e)  $-x+1, -y+1, -z+1$ ; f)  $x, y, -z+1/2$ .

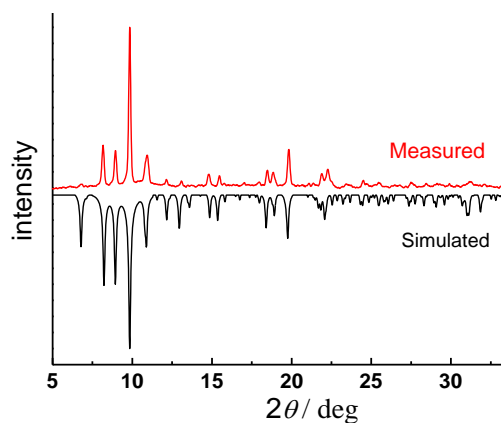

**Fig. S1.** Measured PXRD and simulated patterns of 1.

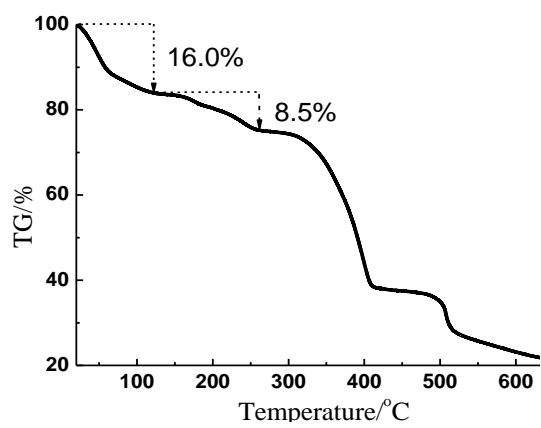

**Fig. S2.** TGA curve of **1**.
